# Supplementary material for: Controlled radical polymerization of styrene with magnetic iron oxides prepared through hydrothermal, bioinspired, and bacterial processes
Source: Royal Society of Chemistry journal article supplement (doi:10.1039/c5ra09149g), 2015-01-01
Supplement: c5ra09149g1.pdf [file c5ra09149g1.pdf]

**Electronic Supplementary Information for:**

**Controlled radical polymerization of styrene with magnetic iron oxides prepared through hydrothermal, bioinspired, and bacterial processes**

*Arihiro Kanazawa,<sup>\*a</sup> Kotaro Satoh,<sup>b</sup> Shokyoku Kanaoka,<sup>a</sup> Masato Kakihana,<sup>c</sup> Makoto Kobayashi,<sup>c</sup> Junki Sato,<sup>c</sup> Hiroaki Imai,<sup>d</sup> Yuya Oaki,<sup>d</sup> Atsushi Arakaki,<sup>e</sup> Kiyofumi Katagiri,<sup>f</sup> Masami Kamigaito<sup>\*b</sup> and Sadahito Aoshima<sup>\*a</sup>*

<sup>a</sup> Department of Macromolecular Science, Graduate School of Science, Osaka University, Toyonaka, Osaka 560-0043, Japan

<sup>b</sup> Department of Applied Chemistry, Graduate School of Engineering, Nagoya University, Chikusa-ku, Nagoya 464-8603, Japan

<sup>c</sup> Institute of Multidisciplinary Research for Advanced Materials, Tohoku University, Aoba-ku, Sendai 980-8577, Japan

<sup>d</sup> Department of Applied Chemistry, Faculty of Science and Technology, Keio University, Kohoku-ku, Yokoyama 223-8522, Japan

<sup>e</sup> Division of Biotechnology and Life Science, Institute of Engineering, Tokyo University of Agriculture and Technology, Koganei, Tokyo 184-8588, Japan

<sup>f</sup> Department of Applied Chemistry, Graduate School of Engineering, Hiroshima University, Higashi-Hiroshima, Hiroshima 739-8527, Japan

**Contents:**

**Figure S1.** MWD curves for the poly(MMA)s

**Figure S2.** MWD curves for the polystyrenes obtained in the monomer addition experiment

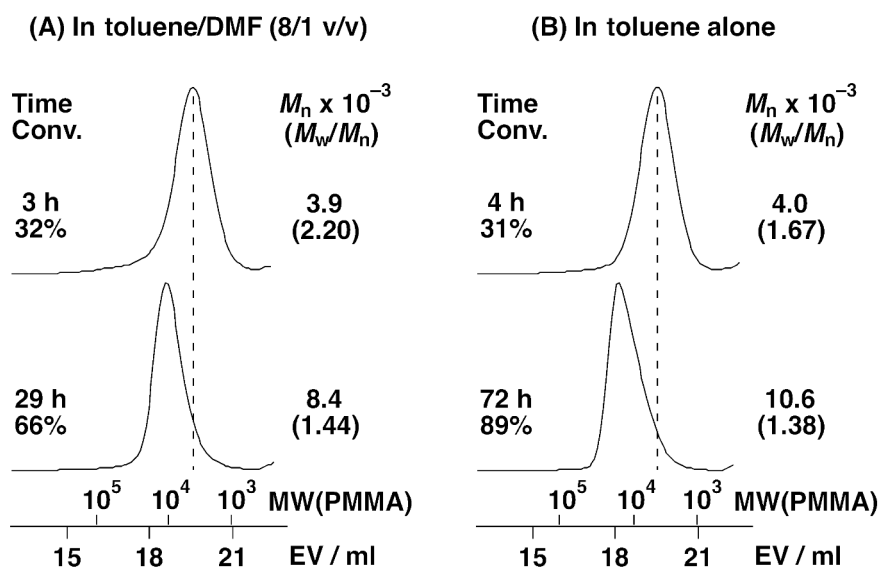

**Figure S1.** MWD curves for the poly(MMA)s:  $[MMA]_0 = 4.0$  M,  $[EBPA]_0 = 40$  mM,  $[Fe_3O_4]_0/[EBPA]_0 = 2$ ,  $[Ph_3P]_0 = 20$  mM, in (A) toluene/DMF (8/1 v/v; entry 15 in Table 1) or (B) toluene alone (entry 16 in Table 1) at 80 °C.

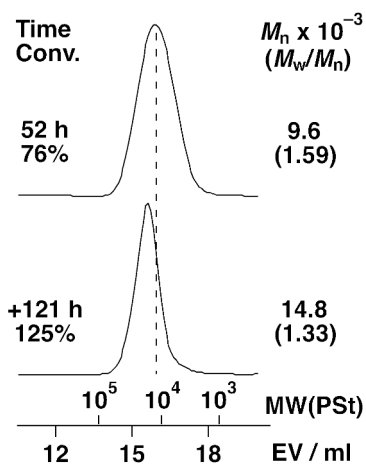

**Figure S2.** MWD curves for the polystyrenes obtained in the monomer addition experiment using  $Fe_3O_4$  prepared through hydrothermal synthesis:  $[styrene]_0 = 4.0$  M,  $[styrene]_{added} = 4.0$  M,  $[EBPA]_0 = 40$  mM,  $[Fe_3O_4]_0/[EBPA]_0 = 2$ ,  $[Ph_3P]_0 = 20$  mM, in toluene/DMF (8/1 v/v) at 80 °C.

**Note for Figure S2:** The polymerization rate gradually became smaller. The decrease of the stirring efficiency due to the increased viscosity may be partly responsible for the deceleration. In particular, stirring stopped after the monomer conversion reached approximately 120%.
